# Supplementary material for: One nutritional symbiosis begat another: Phylogenetic evidence that the ant tribe Camponotini acquired Blochmannia by tending sap-feeding insects
Source: Springer Nature journal article supplement (doi:10.1186/1471-2148-9-292), 2009-01-01
Supplement: 12862_2009_1206_MOESM1_ESM.pdf [file 12862_2009_1206_MOESM1_ESM.pdf]

**Additional file 1. Database matches for 52 new bacterial 16S rDNA sequences obtained in this study.**

| Ant specimen                                      | Query length (bp) | Best BLASTn hit                                    | GB number of best BLASTn hit | E-value | <i>Blochmannia</i> rank <sup>1</sup> | Best match in RDP                                   | GB number of best RDP match | RDP similarity score | <i>Blochmannia</i> rank <sup>1</sup> |
|---------------------------------------------------|-------------------|----------------------------------------------------|------------------------------|---------|--------------------------------------|-----------------------------------------------------|-----------------------------|----------------------|--------------------------------------|
| <i>Calomyrmex albertisi</i> 191                   | 827               | <i>Blochmannia</i> - <i>C. ulcerosus</i>           | AY334375                     | 0       | 1                                    | <i>Blochmannia</i> - <i>C. festinatus</i>           | AY196851                    | 0.965                | 1                                    |
| <i>Calomyrmex laevissimus</i> 254                 | 787               | <i>Blochmannia</i> - <i>C. ulcerosus</i>           | AY334375                     | 0       | 1                                    | <i>Blochmannia</i> - <i>C. festinatus</i>           | AY196851                    | 0.956                | 1                                    |
| <i>Camponotus clarithorax</i> 233                 | 808               | <i>Blochmannia</i> - <i>C. ligniperdus</i>         | X92551                       | 0       | 1                                    | <i>Blochmannia</i> - <i>C. ligniperdus</i>          | X92551                      | 0.988                | 1                                    |
| <i>Camponotus claviscapus</i> 227                 | 739               | <i>Blochmannia</i> - <i>C. vafer</i>               | AY334369                     | 0       | 1                                    | <i>Blochmannia</i> - <i>C. vafer</i>                | AY334369                    | 0.978                | 1                                    |
| <i>Camponotus conithorax</i> 187                  | 682               | <i>Blochmannia</i> - <i>C. ulcerosus</i>           | AY334375                     | 0       | 1                                    | <i>Blochmannia</i> - <i>C. ulcerosus</i>            | AY334375                    | 0.946                | 1                                    |
| <i>Camponotus consobrinus</i> 239                 | 772               | <i>Blochmannia</i> - <i>C. ulcerosus</i>           | AY334375                     | 0       | 1                                    | <i>Blochmannia</i> - <i>C. vafer</i>                | AY334369                    | 0.965                | 1                                    |
| <i>Camponotus hyatti</i> 186                      | 819               | <i>Blochmannia</i> - <i>C. sayi</i>                | AY334371                     | 0       | 1                                    | <i>Blochmannia</i> - <i>C. sayi</i>                 | AY334371                    | 0.989                | 1                                    |
| <i>Camponotus maritimus</i> 185                   | 785               | <i>Blochmannia</i> - <i>C. sansabeanus</i>         | AY334368                     | 0       | 1                                    | <i>Blochmannia</i> - <i>C. sansabeanus</i>          | AY334368                    | 0.989                | 1                                    |
| <i>Camponotus vicinus</i> 235                     | 805               | <i>Blochmannia</i> - <i>C. vicinus</i>             | AY334374                     | 0       | 1                                    | <i>Blochmannia</i> - <i>C. vicinus</i>              | AY334374                    | 0.985                | 1                                    |
| <i>Camponotus occultus</i> 229                    | 757               | <i>Blochmannia</i> - <i>C. vafer</i>               | AY334369                     | 0       | 1                                    | <i>Blochmannia</i> - <i>C. vafer</i>                | AY334369                    | 0.974                | 1                                    |
| <i>Camponotus quercicola</i> 228                  | 784               | <i>Blochmannia</i> - <i>C. castaneus</i>           | AY334377                     | 0       | 1                                    | <i>Blochmannia</i> - <i>C. castaneus</i>            | AY334377                    | 0.993                | 1                                    |
| <i>Camponotus sanctaefidei</i> 240                | 747               | <i>Blochmannia</i> - <i>C. floridanus</i>          | BX248583                     | 0       | 1                                    | <i>Blochmannia</i> - <i>C. floridanus</i>           | AY334381                    | 0.980                | 1                                    |
| <i>Camponotus semitestaceus</i> 242               | 785               | <i>Blochmannia</i> - <i>C. sansabeanus</i>         | AY334368                     | 0       | 1                                    | <i>Blochmannia</i> - <i>C. sansabeanus</i>          | AY334368                    | 0.988                | 1                                    |
| <i>Camponotus</i> sp. cf. <i>simillimus</i> . 199 | 825               | <i>Blochmannia</i> - <i>C. abdominalis</i>         | AJ245591                     | 0       | 1                                    | <i>Blochmannia</i> - <i>C. abdominalis</i>          | AJ245591                    | 0.988                | 1                                    |
| <i>Camponotus nitidior</i> 201                    | 796               | <i>Blochmannia</i> - <i>C. castaneus</i>           | AY334377                     | 0       | 1                                    | <i>Blochmannia</i> - <i>C. festinatus</i>           | AY196851                    | 0.978                | 1                                    |
| <i>Camponotus atriceps</i> 203                    | 825               | <i>Blochmannia</i> - <i>C. floridanus</i>          | BX248583                     | 0       | 1                                    | <i>Blochmannia</i> - <i>C. floridanus</i>           | AY334381                    | 0.999                | 1                                    |
| <i>Camponotus atriceps</i> 217                    | 794               | <i>Blochmannia</i> - <i>C. floridanus</i>          | BX248583                     | 0       | 1                                    | <i>Blochmannia</i> - <i>C. floridanus</i>           | AY334381                    | 0.999                | 1                                    |
| <i>Camponotus atriceps</i> 219                    | 776               | <i>Blochmannia</i> - <i>C. abdominalis</i>         | AJ245591                     | 0       | 1                                    | <i>Blochmannia</i> - <i>C. floridanus</i>           | AY334381                    | 0.997                | 1                                    |
| <i>Camponotus rufipes</i> 220                     | 784               | <i>Blochmannia</i> - <i>C. rufipes</i>             | X92552                       | 0       | 1                                    | <i>Blochmannia</i> - <i>C. rufipes</i>              | X92552                      | 0.999                | 1                                    |
| <i>Camponotus sericeiventris</i> 213              | 802               | <i>Blochmannia</i> - <i>C. sericeiventris</i>      | AJ245593                     | 0       | 1                                    | <i>Blochmannia</i> - <i>C. sericeiventris</i>       | AJ245593                    | 0.997                | 1                                    |
| <i>Camponotus crassus</i> 214                     | 766               | <i>Blochmannia</i> - <i>C. ulcerosus</i>           | AY334375                     | 0       | 1                                    | <i>Blochmannia</i> - <i>C. abdominalis</i>          | AJ245591                    | 0.979                | 1                                    |
| <i>Camponotus crassus</i> 223                     | 755               | <i>Blochmannia</i> - <i>C. ulcerosus</i>           | AY334375                     | 0       | 1                                    | <i>Blochmannia</i> - <i>C. vafer</i>                | AY334369                    | 0.983                | 1                                    |
| <i>Camponotus renggeri</i> 215                    | 787               | <i>Blochmannia</i> - <i>C. rufipes</i>             | X92552                       | 0       | 1                                    | <i>Blochmannia</i> - <i>C. rufipes</i>              | X92552                      | 0.995                | 1                                    |
| <i>Camponotus renggeri</i> 222                    | 770               | <i>Blochmannia</i> - <i>C. rufipes</i>             | X92552                       | 0       | 1                                    | <i>Blochmannia</i> - <i>C. rufipes</i>              | X92552                      | 0.994                | 1                                    |
| <i>Camponotus</i> sp. 216                         | 803               | <i>Blochmannia</i> - <i>C. vafer</i>               | AY334369                     | 0       | 1                                    | <i>Blochmannia</i> - <i>C. vafer</i>                | AY334369                    | 0.974                | 1                                    |
| <i>Camponotus</i> sp. 221                         | 771               | <i>Blochmannia</i> - <i>C. ulcerosus</i>           | AY334375                     | 0       | 1                                    | <i>Blochmannia</i> - <i>C. fellah</i>               | EF422835                    | 0.980                | 1                                    |
| <i>Camponotus</i> sp. 224                         | 758               | <i>Blochmannia</i> - <i>C. ulcerosus</i>           | AY334375                     | 0       | 1                                    | <i>Blochmannia</i> - <i>C. ulcerosus</i>            | AY334375                    | 0.981                | 1                                    |
| <i>Camponotus lownei</i> 230                      | 786               | <i>Blochmannia</i> - <i>C. ulcerosus</i>           | AY334375                     | 0       | 1                                    | <i>Blochmannia</i> - <i>C. herculeanus</i>          | X92550                      | 0.967                | 1                                    |
| <i>Camponotus</i> sp. 260                         | 766               | <i>Blochmannia</i> - <i>C. vafer</i>               | AY334369                     | 0       | 1                                    | <i>Blochmannia</i> - <i>C. vafer</i>                | AY334369                    | 0.969                | 1                                    |
| <i>Camponotus</i> sp. 261                         | 751               | <i>Blochmannia</i> - <i>C. ulcerosus</i>           | AY334375                     | 0       | 1                                    | <i>Blochmannia</i> - <i>C. ulcerosus</i>            | AY334375                    | 0.978                | 1                                    |
| <i>Camponotus</i> sp. 263                         | 767               | <i>Blochmannia</i> - <i>C. vafer</i>               | AY334369                     | 0       | 1                                    | <i>Blochmannia</i> - <i>C. abdominalis</i>          | AJ245591                    | 0.984                | 1                                    |
| <i>Camponotus suffusus</i> 238                    | 748               | <i>Blochmannia</i> - <i>C. balzani</i>             | AJ245596                     | 0       | 1                                    | <i>Blochmannia</i> - <i>C. sansabeanus</i>          | AY334368                    | 0.962                | 1                                    |
| <i>Camponotus vitreus</i> 231ii                   | 694               | <i>Blochmannia</i> - <i>C. sericeiventris</i>      | AJ245593                     | 0       | 1                                    | <i>Blochmannia</i> - <i>Polyrhachis foreli</i>      | AY336986                    | 0.948                | 1                                    |
| <i>Echinopla australis</i> 253                    | 773               | <i>Blochmannia</i> - <i>C. abdominalis</i>         | AJ245591                     | 0       | 1                                    | <i>Blochmannia</i> - <i>C. festinatus</i>           | AY196851                    | 0.965                | 1                                    |
| <i>Opisthopsis haddoni</i> 244                    | 1432              | <i>Blochmannia</i> - <i>C. ulcerosus</i>           | AY334375                     | 0       | 1                                    | <i>Blochmannia</i> - <i>C. vitiosus</i>             | AB018675                    | 0.955                | 1                                    |
| <i>Opisthopsis haddoni</i> 256                    | 768               | <i>Blochmannia</i> - <i>C. ulcerosus</i>           | AY334375                     | 0       | 1                                    | <i>Blochmannia</i> - <i>C. festinatus</i>           | AY196851                    | 0.958                | 1                                    |
| <i>Opisthopsis respiciens</i> 192                 | 706               | <i>Blochmannia</i> - <i>C. ulcerosus</i>           | AY334375                     | 0       | 1                                    | <i>Blochmannia</i> - <i>C. festinatus</i>           | AY196851                    | 0.960                | 1                                    |
| <i>Polyrhachis cupreata</i> 252                   | 795               | <i>Blochmannia</i> - <i>Polyrhachis foreli</i>     | AY336986                     | 0       | 1                                    | <i>Blochmannia</i> - <i>Polyrhachis foreli</i>      | AY336986                    | 0.955                | 1                                    |
| <i>Polyrhachis foreli</i> 255                     | 730               | <i>Blochmannia</i> - <i>Polyrhachis foreli</i>     | AY336986                     | 0       | 1                                    | <i>Blochmannia</i> - <i>Polyrhachis foreli</i>      | AY336986                    | 0.996                | 1                                    |
| <i>Polyrhachis decumbens</i> 190                  | 736               | <i>Blochmannia</i> - <i>Polyrhachis foreli</i>     | AY336986                     | 0       | 1                                    | <i>Blochmannia</i> - <i>Polyrhachis foreli</i>      | AY336986                    | 0.962                | 1                                    |
| <i>Polyrhachis</i> sp. 189                        | 904               | <i>Blochmannia</i> - <i>Polyrhachis foreli</i>     | AY336986                     | 0       | 1                                    | <i>Blochmannia</i> - <i>Polyrhachis lamellidens</i> | AB018680                    | 0.944                | 1                                    |
| <i>Camponotus leonardi</i> 225                    | 775               | <i>Blochmannia</i> - <i>C. floridanus</i>          | BX248583                     | 0       | 1                                    | uncultured bacterium                                | DQ124751                    | 0.950                | 4                                    |
| <i>Camponotus gasserii</i> 243                    | 757               | <i>Blochmannia</i> - <i>C. ulcerosus</i>           | AY334375                     | 0       | 1                                    | 2° symbiont of <i>Planococcus citri</i> (mealybug)  | AF322016                    | 0.944                | >20                                  |
| <i>Camponotus etiolatus</i> 264                   | 743               | <i>Blochmannia</i> - <i>C. vafer</i>               | AY334369                     | 0       | 1                                    | <i>Plesiomonas shigelloides</i>                     | DQ822740                    | 0.954                | >20                                  |
| <i>Camponotus</i> sp. 259                         | 732               | 2° symbiont of <i>Planococcus citri</i> (mealybug) | AF476107                     | 0       | 3                                    | <i>Blochmannia</i> - <i>C. festinatus</i>           | AY196851                    | 0.957                | 1                                    |
| <i>Camponotus</i> BCA-01 188                      | 748               | 2° symbiont of <i>Planococcus citri</i> (mealybug) | AF476107                     | 0       | 6                                    | Enterobacteriaceae bacterium LA20                   | DQ822739                    | 0.953                | >20                                  |

|                                      |      |                                                     |          |   |    |                                           |          |       |     |
|--------------------------------------|------|-----------------------------------------------------|----------|---|----|-------------------------------------------|----------|-------|-----|
| <i>Camponotus</i> sp. 262            | 758  | 2° symbiont of <i>Planococcus citri</i> (mealybug)  | AF476107 | 0 | 13 | <i>Enterobacteriaceae</i> bacterium LA20  | DQ822739 | 0.958 | >20 |
| <i>Camponotus saundersi</i> 265      | 713  | Uncultured bacterium clone PB1_ aai26f03            | EU460325 | 0 | 5  | <i>Rahnella</i> sp. Nj-65                 | AJ842247 | 0.954 | >20 |
| <i>Camponotus papago</i> 232         | 772  | Uncultured bacterium from <i>Tetropium</i> (beetle) | AM946408 | 0 | 6  | <i>Enterobacteriaceae</i> bacterium LA20  | DQ822739 | 0.953 | >20 |
| <i>Notostigma carazzi</i> 226        | 1202 | <i>Sodalis glossinidius</i> str. 'morsitans'        | AP008232 | 0 | 44 | uncultured bacterium                      | EU136818 | 0.949 | >20 |
| <i>Opisthopsis</i> PG01 258 -clone 1 | 864  | <i>Blochmannia</i> - <i>C. festinatus</i>           | AY196851 | 0 | 1  | <i>Blochmannia</i> - <i>C. festinatus</i> | AY196851 | 0.965 | 1   |
| <i>Opisthopsis</i> PG01 258 -clone 2 | 864  | <i>Blochmannia</i> - <i>C. ulcerosus</i>            | AY334375 | 0 | 1  | <i>Pantoea</i> sp. LUP                    | EF474461 | 0.977 | 3   |

<sup>1</sup> "*Blochmannia* rank" lists the order that a *Blochmannia* sequence first appeared in the list of top hits. When this value is ">20" for the RDP comparisons, no *Blochmannia* sequences appeared in the top 20 matches reported. The vast majority (45/50) of sequences most closely matched a published *Blochmannia* 16S rDNA sequence in NCBI (compared using BLASTn) and/or the Ribosomal Database Project (RDP; compared using SeqMatch). These numbers exclude the two *Opisthopsis* PG01 clones, which were selected based on their match to *Blochmannia* (see Methods) and are listed in grey font at the end of the table.
