# Supplementary material for: One nutritional symbiosis begat another: Phylogenetic evidence that the ant tribe Camponotini acquired Blochmannia by tending sap-feeding insects
Source: Springer Nature journal article supplement (doi:10.1186/1471-2148-9-292), 2009-01-01

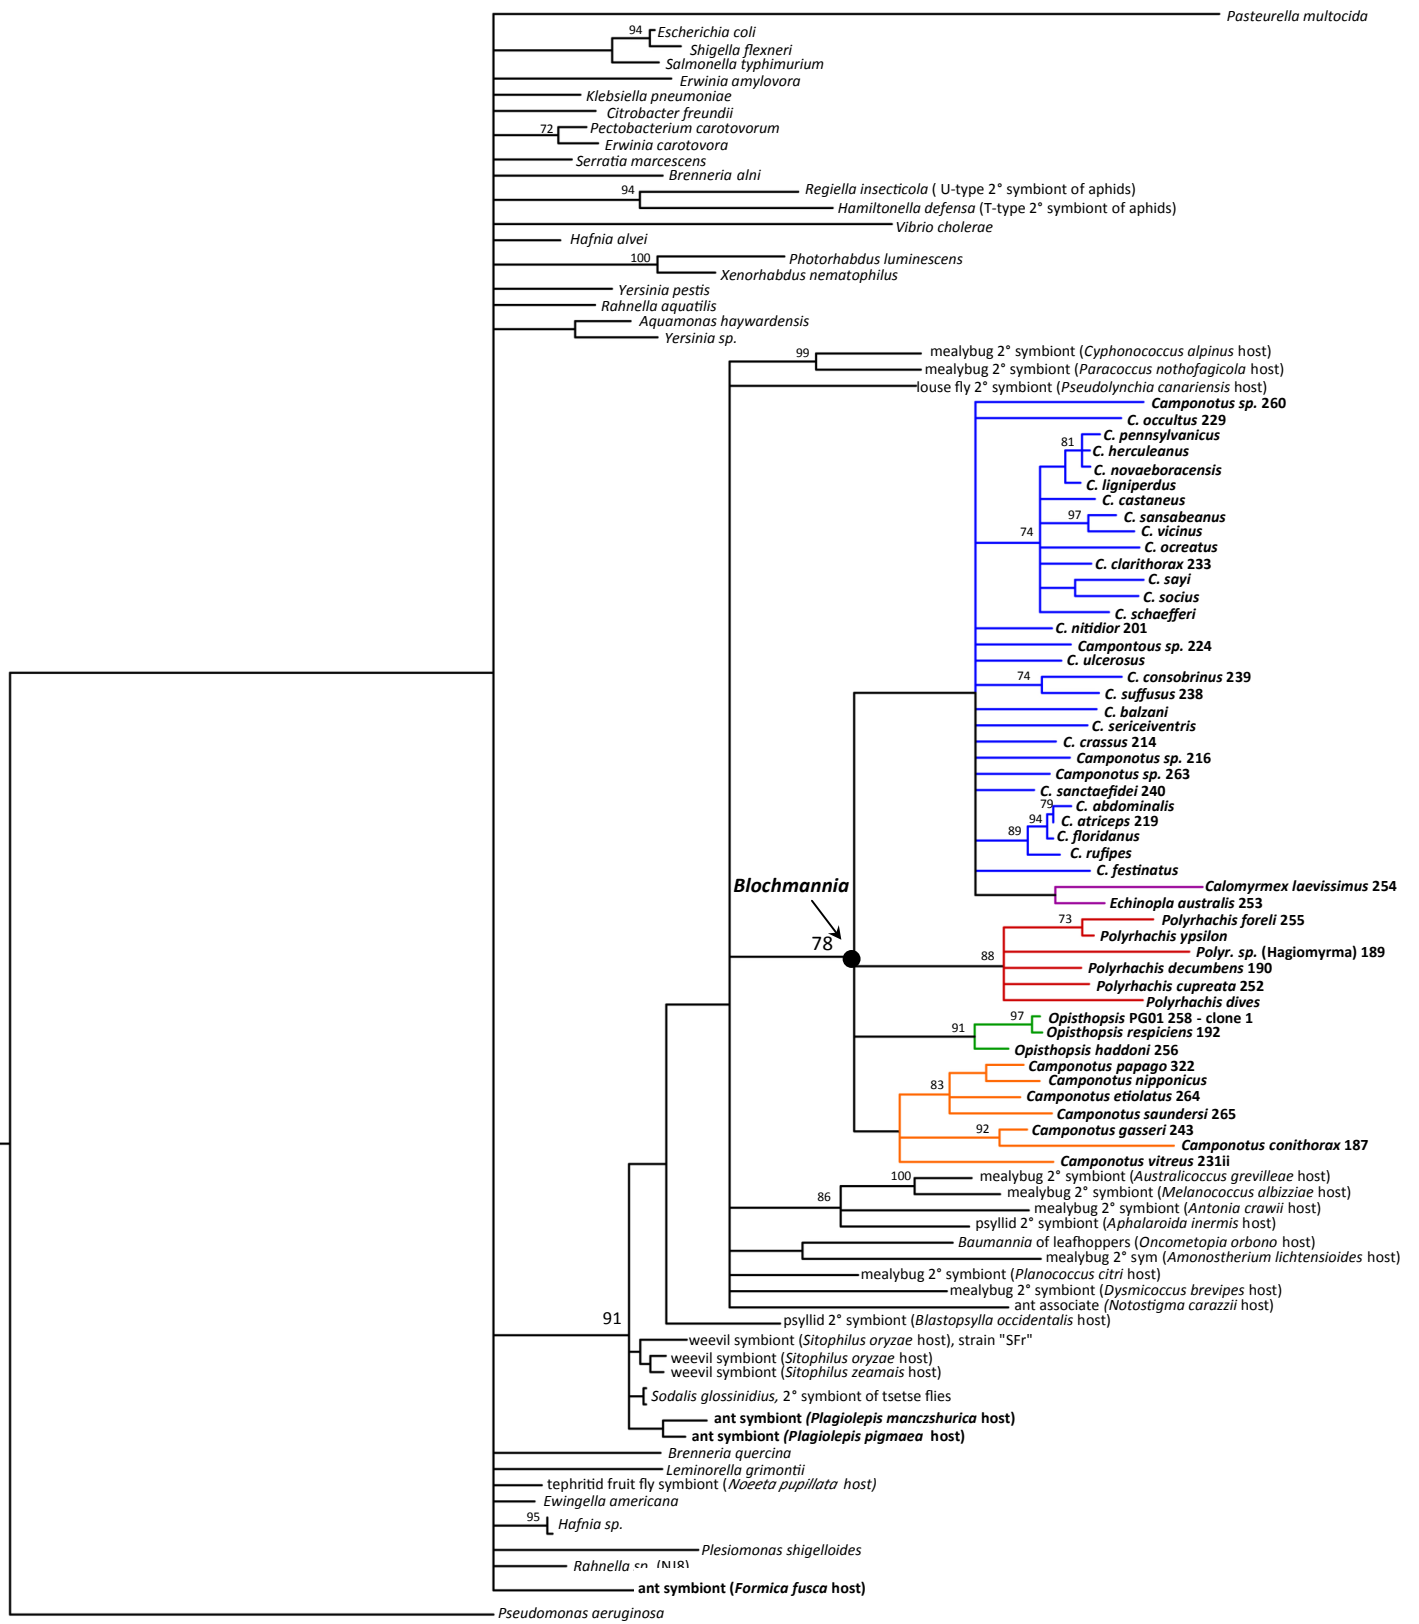

Supplement: 12862_2009_1206_MOESM2_ESM.pdf [file 12862_2009_1206_MOESM2_ESM.pdf]
